# Supplementary material
Source: PubMed Central journal article supplement (PMC2409237)
Supplement: pnas_0704154104_1.pdf [file pnas_0704154104_1.pdf]

Table 2. Lipid droplet phenotypes of yeast gene disruption mutants\*

| Gene name | Log phase              | Stationary phase       |
|-----------|------------------------|------------------------|
| ADE8      | Like WT                | Heterogeneous in size  |
| ADE12 †   | Indistinct(B) ‡        | Many, indistinct       |
| ADK1      | Aggregated             | Many, centralized §    |
| ANP1      | Like WT                | Many, centralized      |
| APN1 †    | Many, indistinct       | Many, centralized      |
| ATP3 †    | Like WT                | Large                  |
| BEM2      | Large                  | Large                  |
| BUD32 †   | Like WT                | Many, indistinct       |
| BUR2      | Many, large            | Heterogeneous in size  |
| CHC1 †    | Many, dispersed        | Many, indistinct       |
| CNM67 †   | Like WT                | Many, dispersed        |
| DOA1      | Small(B), dim          | Small, many            |
| DRS2      | Like WT                | Many, large            |
| ECM1      | Small(B), dim          | Indistinct             |
| ERD1      | Many, dispersed        | Many, indistinct(B)    |
| EST3      | Many, large            | Many, indistinct       |
| FAB1      | Few, large, aggregated | Indistinct, aggregated |
| HPR1 †    | Many, indistinct(B)    | Many, indistinct(B)    |
| KEM1      | Small, dim             | Many, indistinct(B)    |
| MDM20     | Many, indistinct(B)    | Indistinct             |
| MED2      | Many, indistinct(B)    | Many, indistinct       |
| MOG1      | Like WT                | Many, dispersed        |
| MRM2      | Small, dim             | Many, indistinct(B)    |
| MSN1      | Small, dim             | Many, dispersed        |
| NEM1      | Rings                  | Large                  |
| OST4      | Many, indistinct(B)    | Many, indistinct       |
| PAF1      | Many, large            | Many, large            |
| PEP5      | Indistinct, aggregated | Many, dispersed        |
| PEP7      | Indistinct, aggregated | Many, centralized      |
| PLC1 †    | Like WT                | Many, indistinct       |
| PPA1      | Like WT                | Indistinct             |
| ROX3 †    | Many, large            | Many, indistinct       |
| SCP160    | Many, indistinct(B)    | Many, indistinct       |
| SEC22     | Small, many            | Many, indistinct(B)    |
| SLA2 †    | Like WT                | Indistinct, aggregated |
| SPO7      | Rings                  | Few, large, aggregated |
| SPT10 †   | Many, indistinct(B)    | Many, dispersed        |
| SRV2 †    | Many, indistinct       | Many, indistinct       |
| SSD1      | Small, dim             | Many, indistinct       |
| STO1      | Many, indistinct       | Many, centralized      |
| TOM5      | Large                  | Indistinct(B)          |
| TFP1      | Large                  | Indistinct, aggregated |
| TPD3 †    | Like WT                | Many, indistinct       |
| VAC14     | Small, dim             | Many, dispersed        |
| VMA2      | Like WT                | Small, dim             |
| VMA4      | Large                  | Many, dim              |
| VMA6      | Large                  | Indistinct, aggregated |
| VMA7      | Aggregated             | Indistinct(B)          |
| VMA22     | Small(B), dim          | Indistinct(B)          |
| VPS4      | Like WT                | Many, centralized      |
| VPS16     | Aggregated             | Many, dispersed        |
| VPS21     | Like WT                | Indistinct             |
| VPS24     | Small, dim             | Indistinct(B)          |
| VPS35     | Small, dim             | Indistinct(B)          |
| VPS51     | Many, indistinct       | Many, dim              |
| VPS66     | Small, dim             | Indistinct(B)          |
| YIL039w   | Many, dispersed        | Many, centralized      |
| YLR404w   | Few, large, aggregated | Few, large, aggregated |
| YOR333c   | Small, dim             | Indistinct, aggregated |

\* Phenotypes unique to log phase: Small(B) dim, Aggregated, Rings, Like WT; phenotypes unique to stationary phase: Many dim, Many centralized, Indistinct, Heterogeneous in size.

† Slow growing strain.

‡ (B), borderline, trait close to WT.

§ Centralized: lipid bodies found away from cell cortex.
